# Supplementary material for: MOF-Derived Co Nanoparticles Catalyst Assisted by F- and N-Doped Carbon Quantum Dots for Oxygen Reduction
Source: MDPI journal article supplement (doi:10.3390/nano13142093), 2023-07-18
Supplement: s1 [file s1]

## Supporting information

MOF-derived Co nanoparticles catalyst assisted by F- and N-doped carbon quantum dots for oxygen reduction

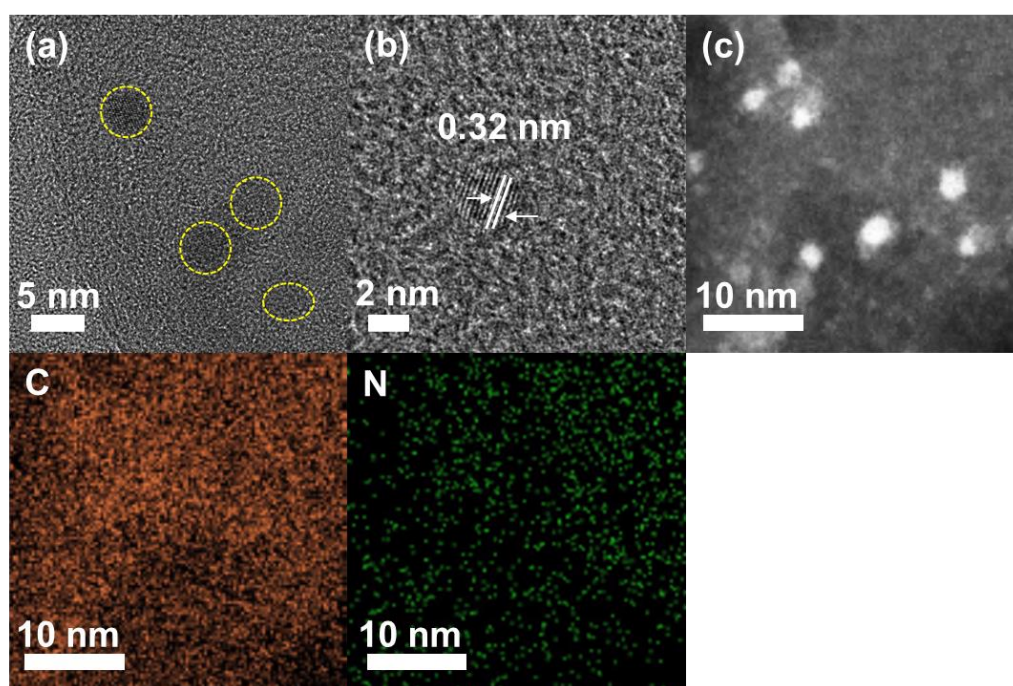

Figure S1. (a) Low- and (b) high-resolution TEM images, (c), EDS mapping results of NCQD.

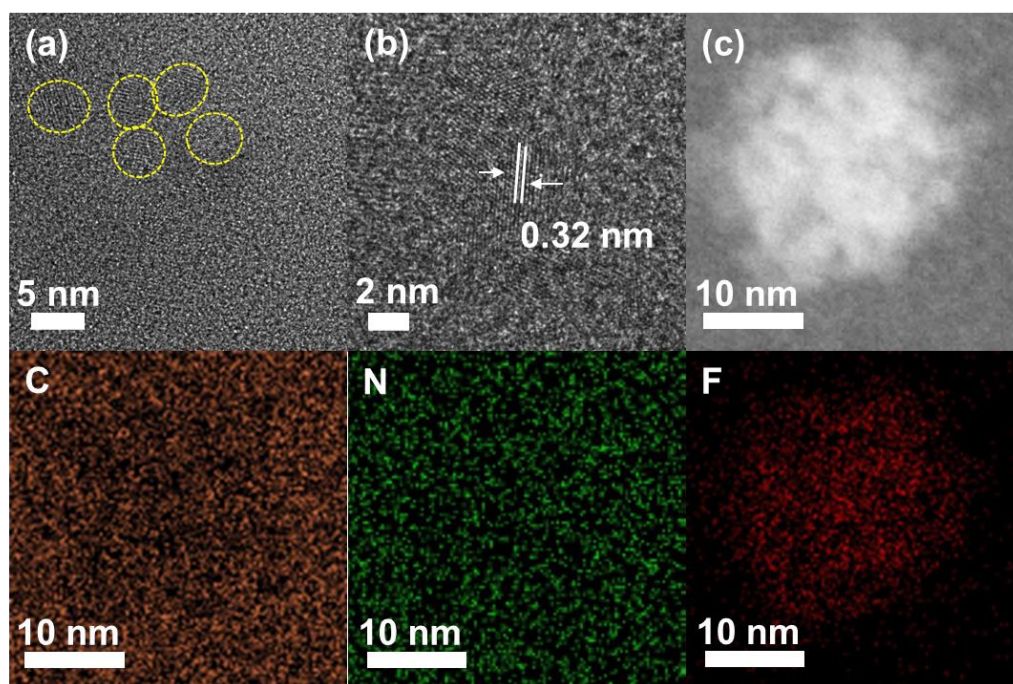

Figure S2. (a) Low- and (b) high-resolution TEM images, (c), EDS mapping results of FNCQD.

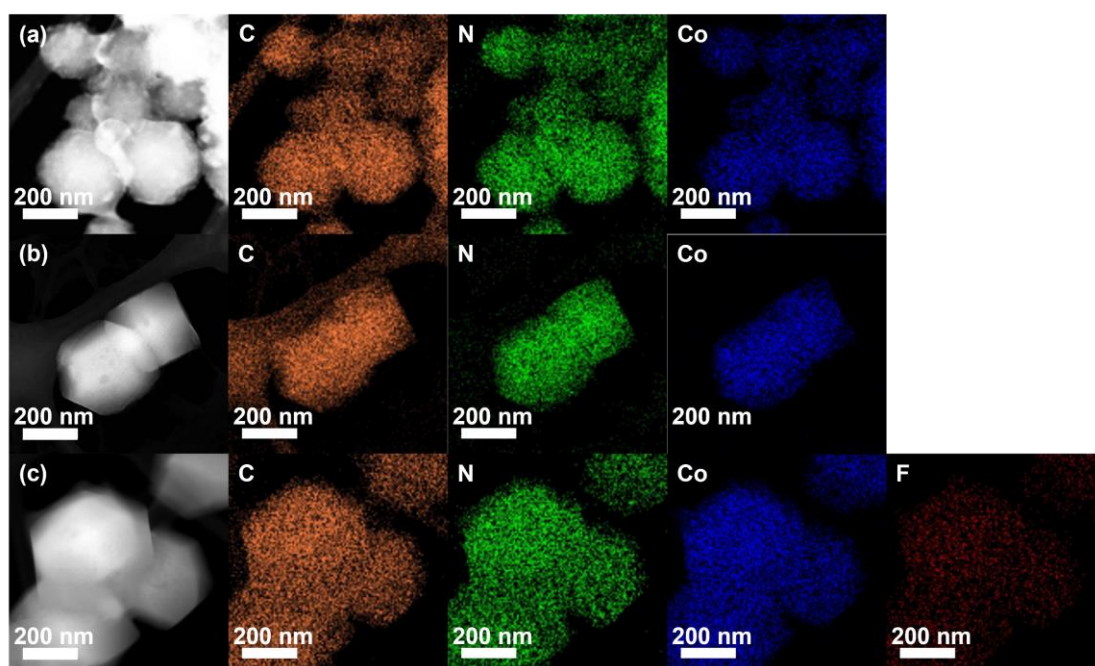

Figure S3. TEM- EDS mapping results of (a) ZIF-67, (b) NCQD/ZIF-67, and (c) FNCQD/ZIF-67.

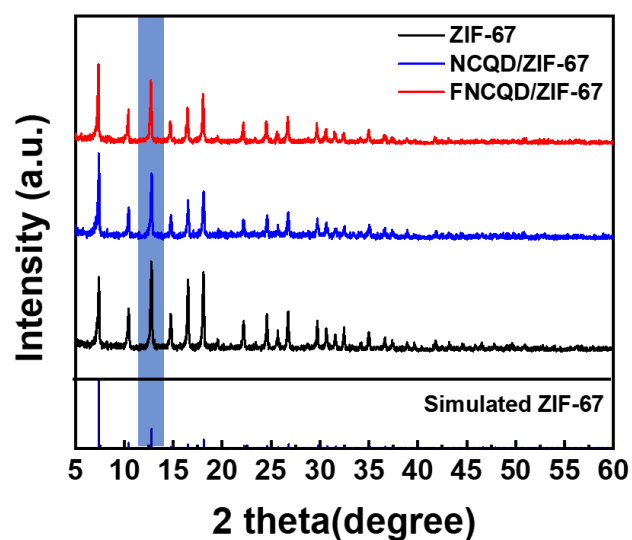

Figure S4. XRD patterns of ZIF-67, NCQD/ZIF-67 and FNCQD/ZIF-67.

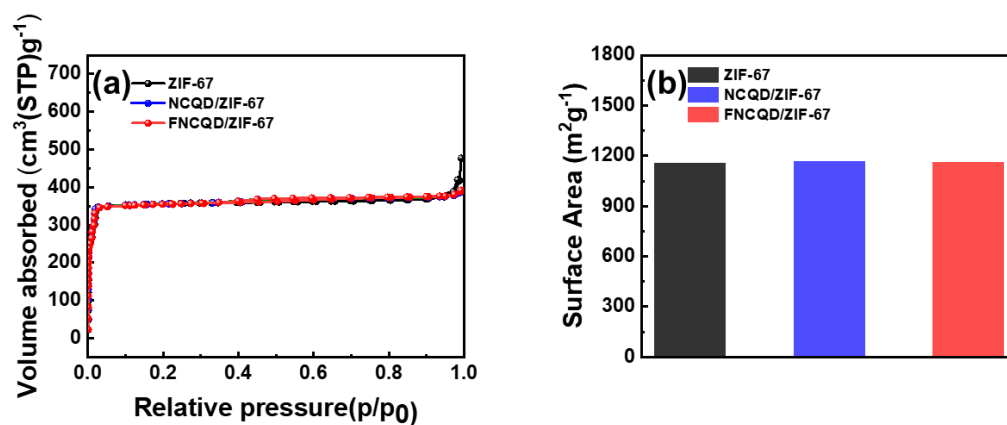

Figure S5. (a) BET gas adsorption plots, (b) change on BET of ZIF-67, NCQD/ZIF-67 and FNCQD/ZIF-67.

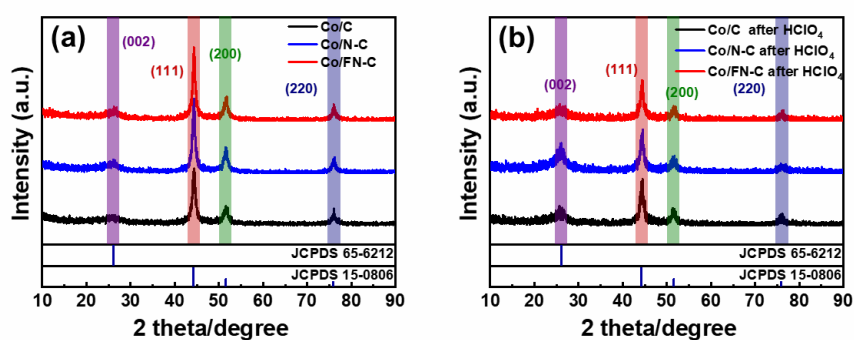

Figure S6. X-ray patterns of (a) before and (b) after  $\text{HClO}_4$  treatment of Co/C, Co/N-C, and



Co/FN-C.

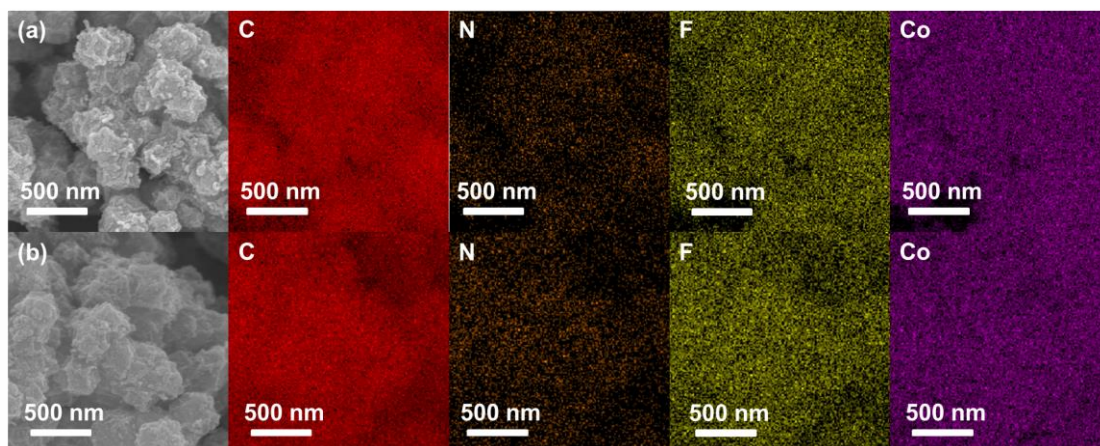

Figure S7. SEM-EDS mapping of C, N, F, and Co of (a) before and (b) after electrochemical test of Co/FN-C electrode.

Table S1. The chemical composition (atomic percent) of before and after the electrochemical test of Co/FN-C electrode.

| Element | Before (atom %) | After (atom %) |
|---------|-----------------|----------------|
| C       | 62.80           | 71.29          |
| N       | 15.77           | 9.68           |
| O       | 12.88           | 11.58          |
| F       | 0.21            | 0.21           |
| Co      | 8.34            | 7.24           |
| Total   | 100             | 100            |
